# Supplementary material
Source: publisher site journal article supplement (https://www.dovepress.com/article/337416)
Supplement: Supplementary file 1 [file get_supplementary_file.php]

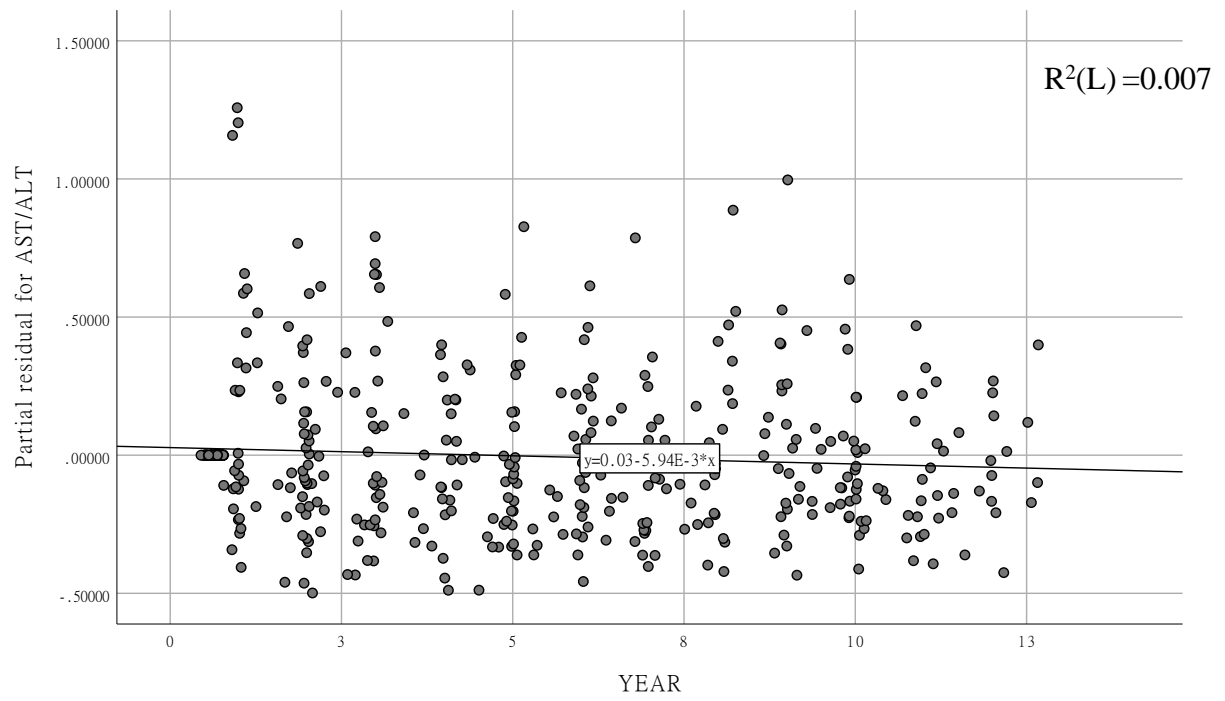

FigS1. The proportional hazards assumption of AST/ALT ratio for incidence of diabetes. AST/ALT ratio met the proportional hazards assumption.
